# Supplementary material for: Evaluation of Respiratory Muscle Dysfunction in Patients with Idiopathic Pulmonary Fibrosis: A Prospective Observational Study with Magnetic Resonance Imaging
Source: Research Square preprint supplement (doi:10.21203/rs.3.rs-4225538/v1), 2024-04-10
Supplement: Supplementary file 1 [file b9611b2faea6e4d2386a7d83.docx]

Supplementary Table 1. Correlations between motion metrics HRQoL and the extent of pulmonary fibrosis.

|  |  | Respiratory symptoms | Activity | Psychosocial impact | GGO  (%) | Reticulation  (%) | Honeycombing  (%) | | Pulmonary fibrosis (%) |
| --- | --- | --- | --- | --- | --- | --- | --- | --- | --- |
| **Chest wall motion metrics** | | | | | | | |
| **TAAL** | Left AP | 0.135 | -0.147 | 0.039 | 0.128 | 0.049 | -0.152 | | -0.120 |
| Right AP | 0.134 | -0.115 | 0.053 | 0.165 | 0.039 | -0.072 | | -0.045 |
| LR | 0.073 | 0.061 | -0.005 | 0.017 | 0.0105 | -0.173 | | -0.027 |
| Area | 0.143 | -0.117 | -0.094 | 0.045 | -0.022 | -0.147 | | -0.105 |
| **TTCL** | Left AP | 0.093 | 0.043 | 0.127 | -0.185 | -0.160 | 0.090 | | -0.086 |
| Right AP | -0.058 | -0.182 | -0.071 | -0.061 | -0.005 | -0.068 | | -0.052 |
| LR | 0.036 | 0.021 | 0.049 | -0.157 | 0.089 | -0.316* | | -0.145 |
| Area | 0.056 | 0.005 | 0.015 | -0.163 | -0.030 | -0.099 | | -0.066 |
| **TLDL** | Left AP | 0.046 | 0.046 | 0.082 | 0.200 | 0.188 | -0.110 | | -0.017 |
| Right AP | 0.038 | -0.194 | -0.063 | 0.037 | -0.059 | -0.118 | | 0.212 |
| LR | -0.036 | -0.082 | -0.207 | -0.129 | -0.198 | -0.063 | | -0.061 |
| Area | -0.029 | -0.161 | -0.167 | -0.049 | -0.066 | -0.104 | | -0.109 |
| **Diaphragm motion metrics** | | | | | | | |
| **TCP** | Left CC | 0.188 | -0.044 | 0.071 | 0.019 | -0.170 | -0.169 | | -0.410** |
| Right CC | 0.181 | 0.164 | 0.028 | 0.028 | -0.266 | -0.138 | | -0.331* |
| Area | 0.033 | 0.130 | 0.024 | -0.005 | -0.211 | -0.217 | | -0.413** |
| **TRSP** | AND | 0.268 | 0.002 | 0.074 | -0.008 | -0.208 | -0.044 | | -0.209 |
| APD | 0.200 | -0.146 | -0.066 | -0.011 | -0.314* | 0.012 | | -0.273 |
| POD | 0.185 | -0.045 | -0.028 | 0.028 | -0.146 | -0.133 | | -0.216 |
| Area | 0.192 | -0.105 | -0.091 | 0.041 | -0.183 | -0.107 | | -0.230 |
| DH | 0.016 | 0.049 | 0.048 | -0.010 | 0.391* | -0.309* | | 0.105 |
| DA | -0.100 | -0.009 | -0.037 | -0.186 | 0.491** | -0.219 | | 0.266 |

NOTE: GGO, ground-glass opacity; TAAL, the arcus aortae level; TTCL, the tracheal carina level; TLDL, the liver dome level; TCP, the coronal plane; TRSP, the right sagittal plane. AP, anterior-posterior (AP) distance; LR, left-right (LR)distance; CC, the cranial-caudal distance; AND, APD, POD, the distance between the lung apex and anterior, apex, and posterior of diaphragm on the sagittal plane, respectively. DH, the height of diaphragm; DA, the area of diaphragm. * indicated *P*＜0.05; ** indicated *P*＜0.01.


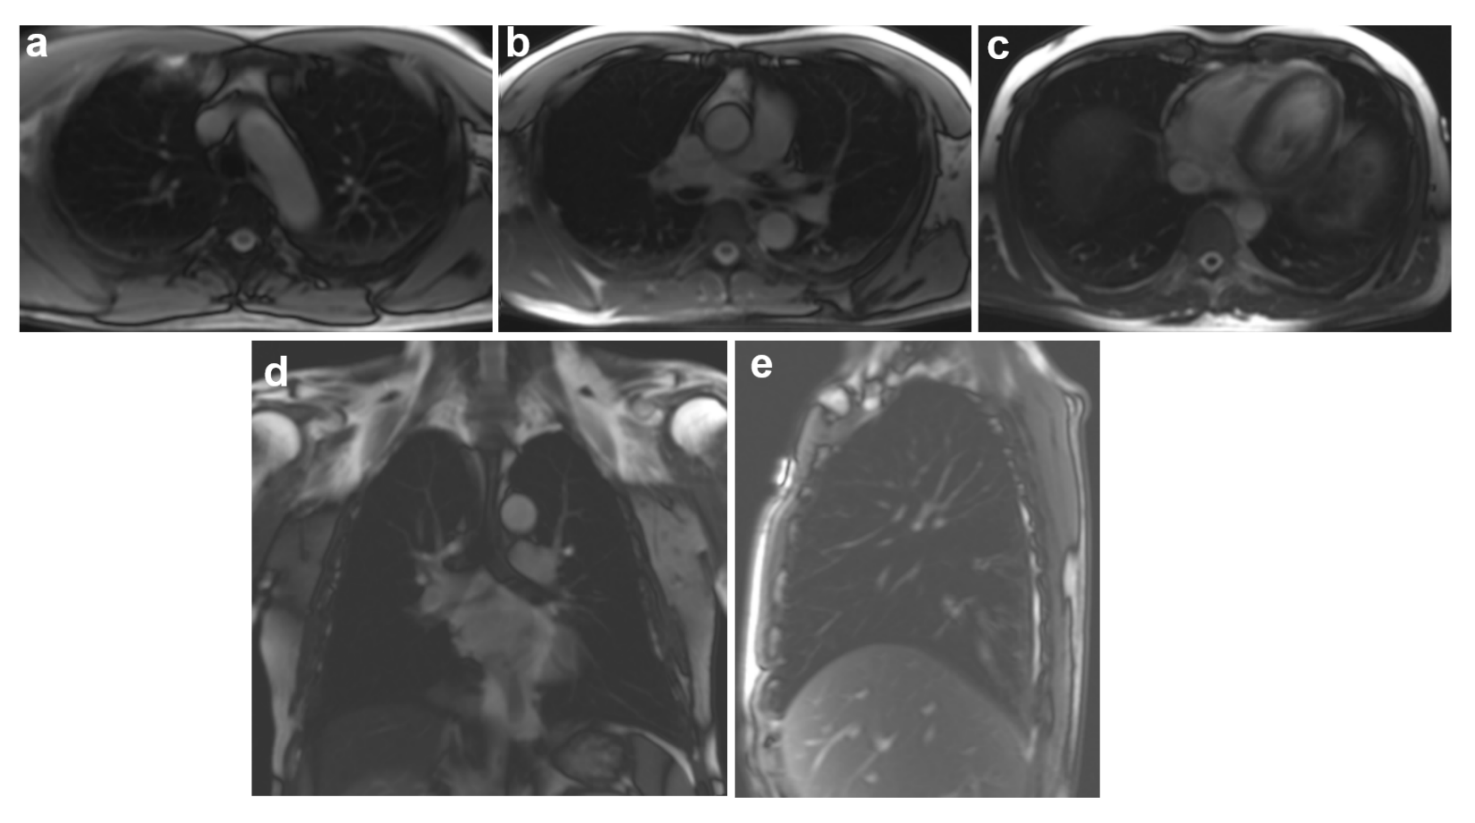


Supplement Figure 1. The orthogonal imaging planes were imaged by dynamic MRI. The transversal planes at the aortic arch (figure a), tracheal carina (figure b), and the liver dome levels (figure c), a coronal plane through tracheal bifurcation (figure d), and a right sagittal plane passing through the lung apex and diaphragm apex (figure e).


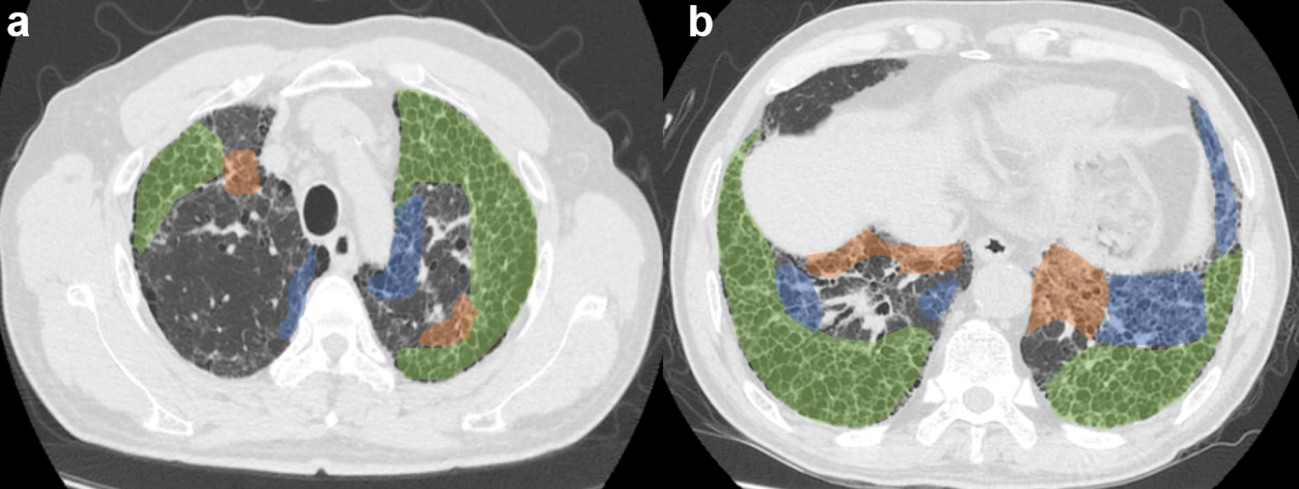


Supplement Figure 2. Segmentation and qualification of Ground-glass opacities (orange region), reticulation（blue region）, and honeycombing sign （green region）on HRCT. The segmentation of radiological patterns was performed with the software InferScholar (<https://www.infer-vision.com/>)


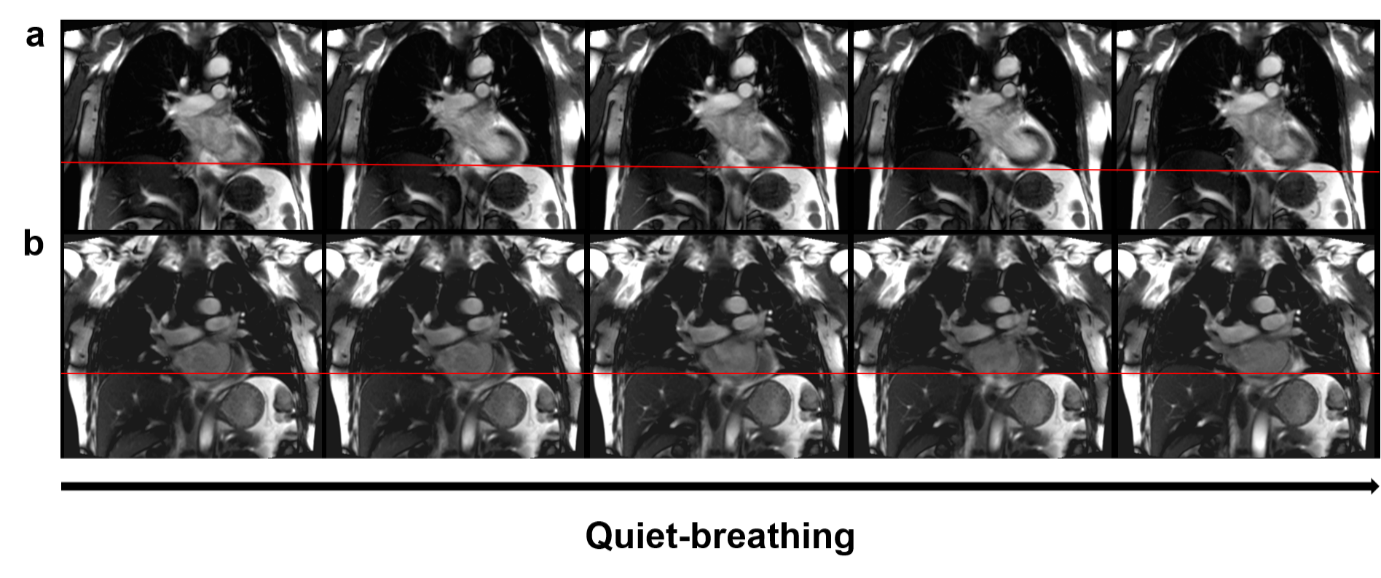


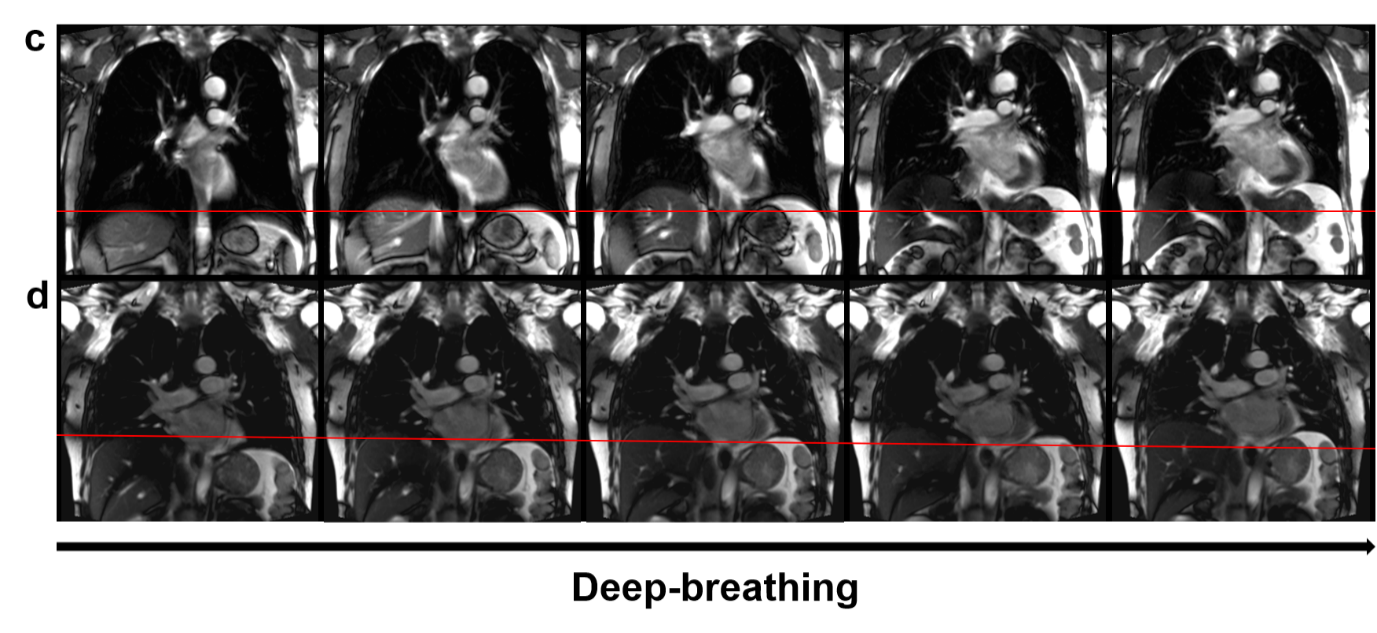


Supplement Figure 3. The free-breathing dynamic MRI in the coronal plane of a healthy volunteer (male, 58-years-old, BMI=24.1) (a, c) and a patient with IPF (male, 58-years-old, BMI=25.5) (b, d) during quiet and deep breathing.


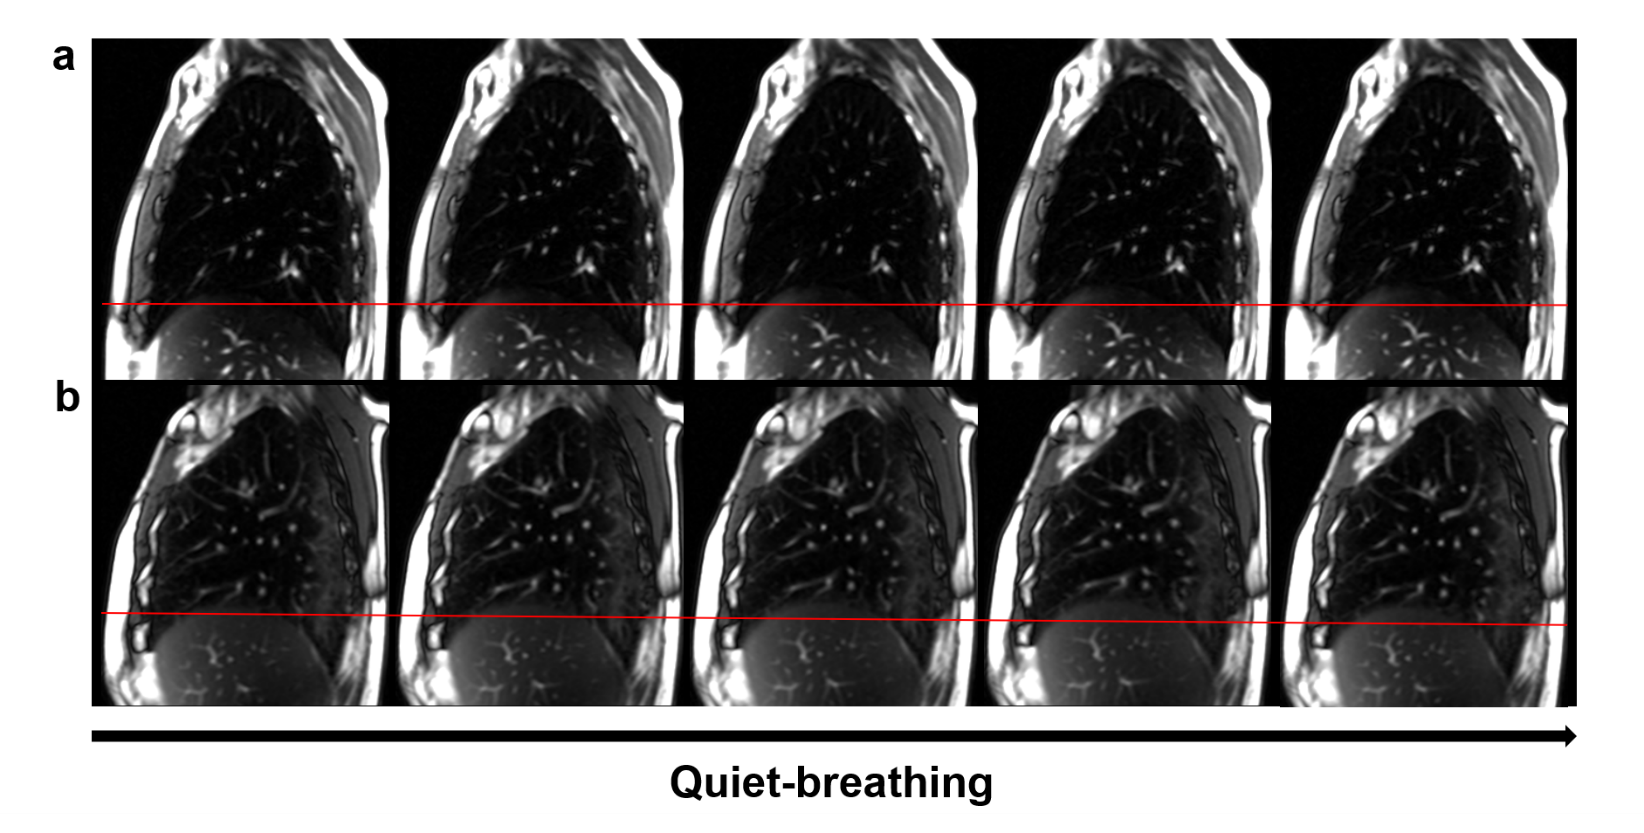

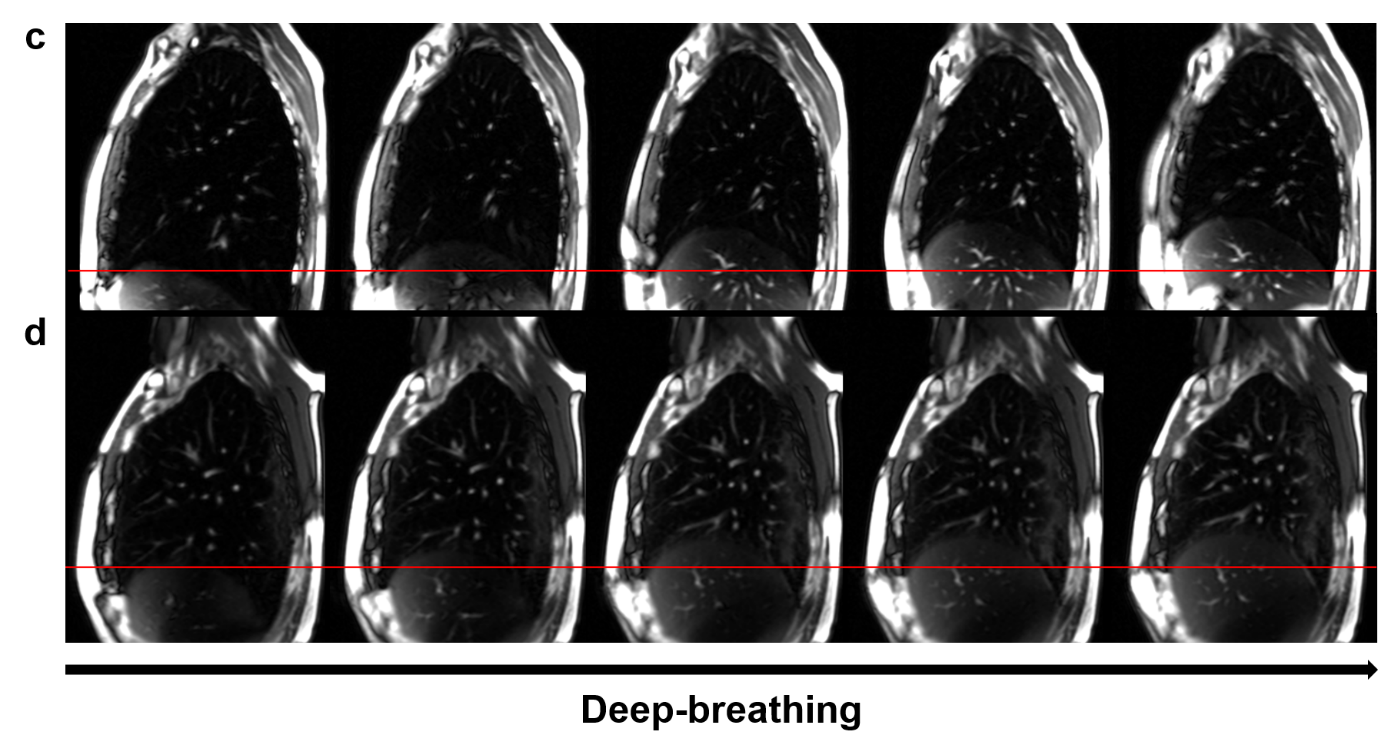


Supplement Figure 4. The dynamic breathing MRI in the right sagittal plane of a healthy volunteer (male, 58-years-old, BMI=24.1) (a, c) and a patient with IPF (male, 58-years-old, BMI=25.5) (b, d) during quiet and deep breathing.
